# Supplementary material for: Differences in oral processing behavior of consumers varying in age, gender and ethnicity lead to changes in bolus properties but only to small differences in dynamic texture perception of sausages
Source: Royal Society of Chemistry journal article supplement (doi:10.1039/d0fo01835j), 2020-01-01
Supplement: d0fo01835j1.pdf [file d0fo01835j1.pdf]

Appendix.

Table A.1. Descriptive data (Mean  $\pm$  SE) of consumption time and bolus properties of consumers differing in age (n=21 young Dutch, n=21 young Chinese), ethnicity (n=22 older adults Dutch, n=21 young Dutch), and gender (n=34 females, n=30 males).

|                                 | Young adults      |                   |                   |                   | Older adults      |                   |
|---------------------------------|-------------------|-------------------|-------------------|-------------------|-------------------|-------------------|
|                                 | Chinese           |                   | Dutch             |                   |                   |                   |
|                                 | Females           | Males             | Females           | Males             | Females           | Males             |
| Total consumption time (s)      | 29.5 $\pm$ 1.8    | 18.8 $\pm$ 1.1    | 16.8 $\pm$ 1.1    | 17.2 $\pm$ 1.4    | 27.6 $\pm$ 2.3    | 23.5 $\pm$ 1.5    |
| <b>33% of consumption time</b>  |                   |                   |                   |                   |                   |                   |
| Hardness (N)                    | 3.08 $\pm$ 0.19   | 3.59 $\pm$ 0.26   | 3.65 $\pm$ 0.26   | 3.63 $\pm$ 0.23   | 3.24 $\pm$ 0.18   | 3.22 $\pm$ 0.19   |
| Adhesiveness (N*s)              | 0.012 $\pm$ 0.002 | 0.018 $\pm$ 0.003 | 0.012 $\pm$ 0.004 | 0.011 $\pm$ 0.002 | 0.013 $\pm$ 0.002 | 0.013 $\pm$ 0.004 |
| Cohesiveness (-)                | 0.48 $\pm$ 0.01   | 0.50 $\pm$ 0.01   | 0.52 $\pm$ 0.01   | 0.52 $\pm$ 0.01   | 0.48 $\pm$ 0.01   | 0.50 $\pm$ 0.01   |
| Particle size d50 ( $\mu$ m)    | 2146 $\pm$ 45     | 1994 $\pm$ 31     | 2142 $\pm$ 40     | 2025 $\pm$ 19     | 2103 $\pm$ 42     | 2122 $\pm$ 41     |
| Number of particles (-)         | 325 $\pm$ 48      | 302.5 $\pm$ 48    | 172 $\pm$ 19      | 287 $\pm$ 37      | 323 $\pm$ 32      | 292 $\pm$ 34      |
| Saliva ratio h <sub>w</sub> (-) | 0.1 $\pm$ 0.01    |
| <b>66% of consumption time</b>  |                   |                   |                   |                   |                   |                   |
| Hardness (N)                    | 2.14 $\pm$ 0.18   | 2.65 $\pm$ 0.15   | 3.0 $\pm$ 0.19    | 2.89 $\pm$ 0.23   | 2.51 $\pm$ 0.13   | 2.54 $\pm$ 0.17   |
| Adhesiveness (N*s)              | 0.024 $\pm$ 0.004 | 0.028 $\pm$ 0.006 | 0.021 $\pm$ 0.004 | 0.02 $\pm$ 0.003  | 0.037 $\pm$ 0.004 | 0.02 $\pm$ 0.003  |
| Cohesiveness (-)                | 0.40 $\pm$ 0.01   | 0.42 $\pm$ 0.01   | 0.45 $\pm$ 0.01   | 0.45 $\pm$ 0.01   | 0.40 $\pm$ 0.01   | 0.44 $\pm$ 0.01   |
| Particle size d50 ( $\mu$ m)    | 1960 $\pm$ 23     | 1958 $\pm$ 27     | 2034 $\pm$ 33     | 1981 $\pm$ 32     | 1946 $\pm$ 27     | 2027 $\pm$ 28     |
| Number of particles (-)         | 494 $\pm$ 35      | 396 $\pm$ 49      | 316 $\pm$ 31      | 427 $\pm$ 45      | 510 $\pm$ 22      | 489 $\pm$ 49      |
| Saliva ratio h <sub>w</sub> (-) | 0.1 $\pm$ 0.01    | 0.1 $\pm$ 0.01    | 0.1 $\pm$ 0.02    | 0.1 $\pm$ 0.01    | 0.1 $\pm$ 0.01    | 0.2 $\pm$ 0.03    |
| <b>100% of consumption time</b> |                   |                   |                   |                   |                   |                   |
| Hardness (N)                    | 1.79 $\pm$ 0.1    | 2.12 $\pm$ 0.13   | 2.35 $\pm$ 0.13   | 2.27 $\pm$ 0.21   | 2.04 $\pm$ 0.1    | 1.86 $\pm$ 0.14   |
| Adhesiveness (N*s)              | 0.04 $\pm$ 0.005  | 0.04 $\pm$ 0.006  | 0.03 $\pm$ 0.005  | 0.03 $\pm$ 0.005  | 0.05 $\pm$ 0.006  | 0.03 $\pm$ 0.005  |
| Cohesiveness (-)                | 0.36 $\pm$ 0.01   | 0.39 $\pm$ 0.01   | 0.41 $\pm$ 0.01   | 0.40 $\pm$ 0.01   | 0.37 $\pm$ 0.01   | 0.39 $\pm$ 0.01   |
| Particle size d50 ( $\mu$ m)    | 1935 $\pm$ 28     | 1944 $\pm$ 27     | 2008 $\pm$ 25     | 1968 $\pm$ 19     | 1936 $\pm$ 20     | 1961 $\pm$ 16     |
| Number of particles (-)         | 623 $\pm$ 32      | 555 $\pm$ 27      | 381 $\pm$ 31      | 526 $\pm$ 40      | 561 $\pm$ 37      | 538 $\pm$ 51      |
| Saliva ratio h <sub>w</sub> (-) | 0.2 $\pm$ 0.02    | 0.2 $\pm$ 0.01    | 0.1 $\pm$ 0.02    | 0.2 $\pm$ 0.01    | 0.2 $\pm$ 0.02    | 0.2 $\pm$ 0.04    |
